# Supplementary material for: Spatio-temporal prediction model of out-of-hospital cardiac arrest: Designation of medical priorities and estimation of human resources requirement
Source: PubMed Central journal article supplement (PMC7458314; doi:10.1371/journal.pone.0238067), 2020-08-31

**A: All**

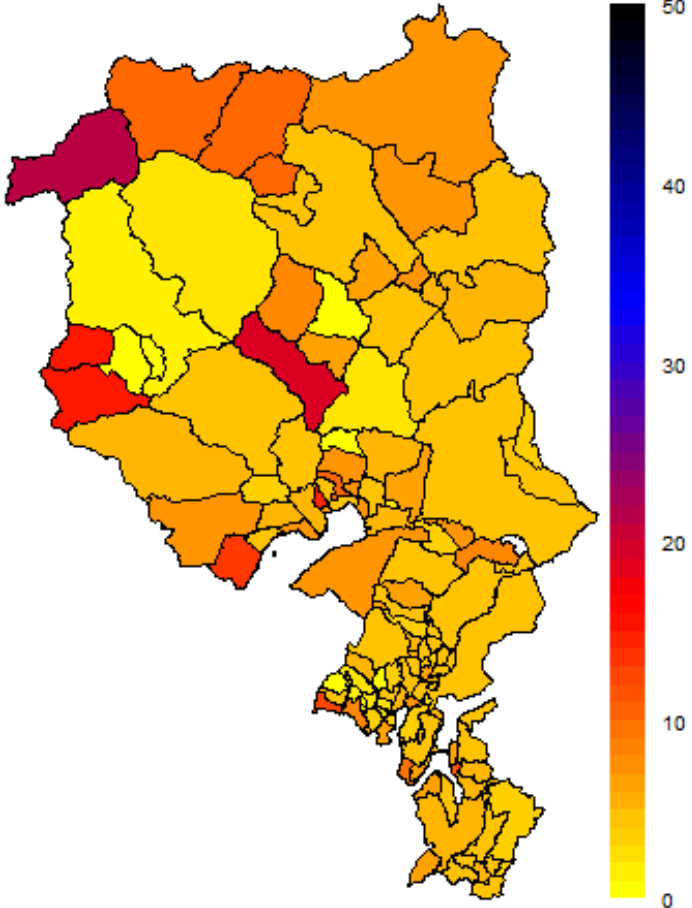

**B: Male**

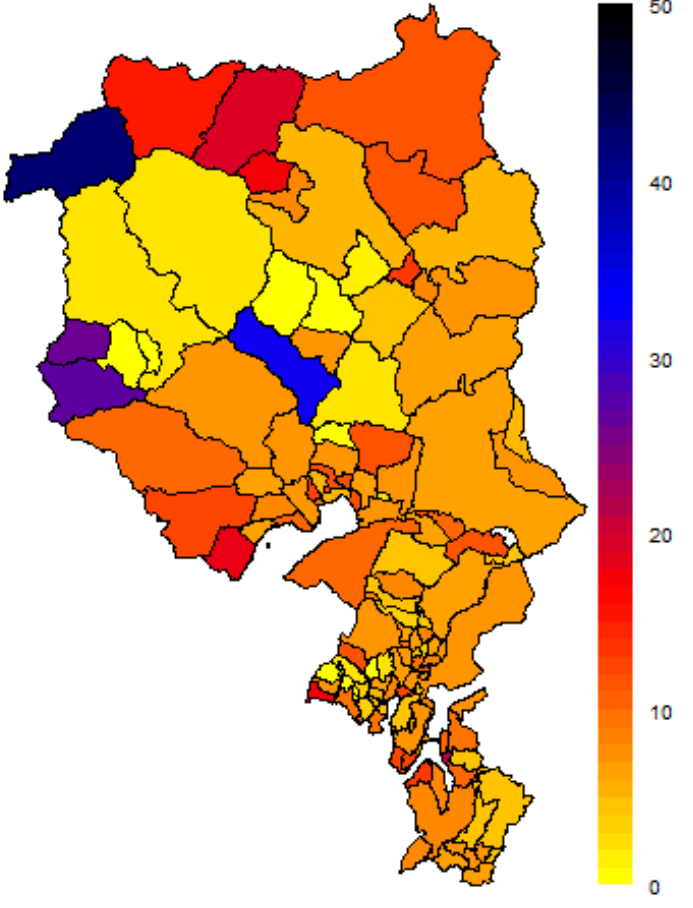

**C: Female**

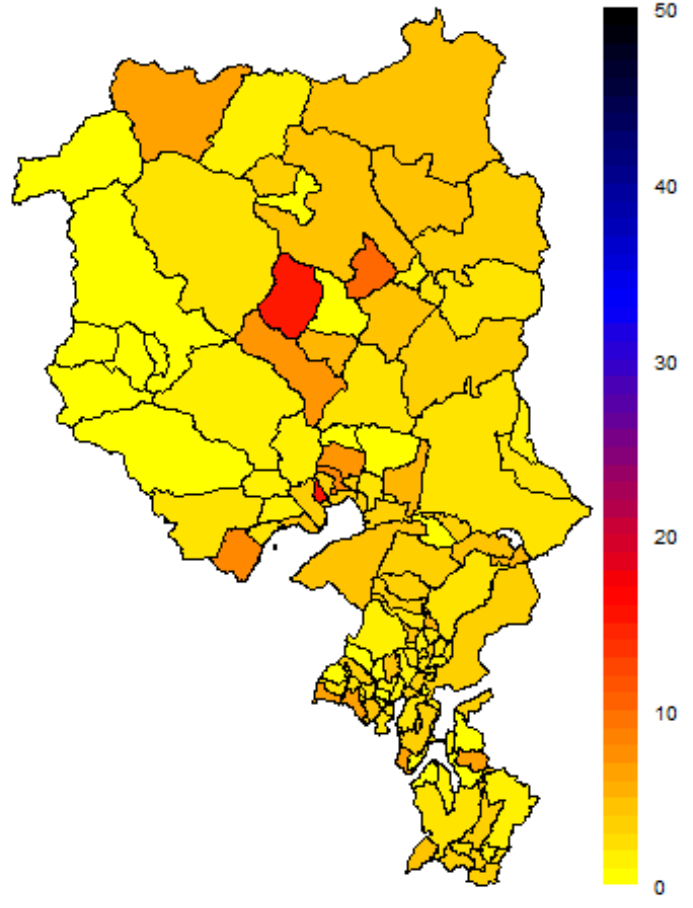

Supplement: pone.0238067.s001.pdf [file pone.0238067.s001.pdf]
